# Supplementary material for: Uncertainty in aerosol hygroscopicity resulting fromsemi-volatile organic compounds
Source: Copernicus journal article supplement (doi:10.5194/acp-2017-300), 2017-04-18
Supplement: Supplementary file 1 [file acp-2017-300-supplement.pdf]

# Uncertainty in aerosol hygroscopicity resulting from semi-volatile organic compounds

Olivia Goulden<sup>1</sup>, Matthew Crooks<sup>1</sup>, and Paul Connolly<sup>1</sup>

<sup>1</sup>The School of Earth, Atmospheric and Environmental Science, The University of Manchester, Oxford Road, Manchester, M13 9PL

## 1 Dependence of $\kappa$ on size distribution

In the main body of the paper, we discuss the effects of SVOCs on the hygroscopicity of non-volatile aerosol modes. Although four different chemical compositions of the particles are considered, only one size distribution is used. In this supplement, we briefly discuss the effect of using different  
5 aerosol size distributions of ammonium sulphate on  $\kappa_{SVOC}$ . We have varied one parameter at a time while using the mean values stated in the main paper for the other two parameters.

Figure 1 shows the variation of  $\kappa_{SVOC}$  with number concentration. A notable dependence is observable with a trend for lower  $\kappa_{SVOC}$  values at higher number concentrations. The uncertainty also decreases with increasing number concentration.

10 Figure 2 shows the dependence of  $\kappa_{SVOC}$  on the geometric standard deviation. Lower  $\kappa_{SVOC}$  values are observed at low and high values of the geometric standard deviation. It is possible that the values that give the largest  $\kappa_{SVOC}$  values, in this case 0.5, may depend on the median diameter. This will be investigated further in future work.

The dependence of  $\kappa_{SVOC}$  on median diameter is shown in Figure 3. Little variation in mean  
15  $\kappa_{SVOC}$  can be observed although the uncertainty reduces by a factor of 2 when the median diameter is increased from 50 nm to 200 nm.

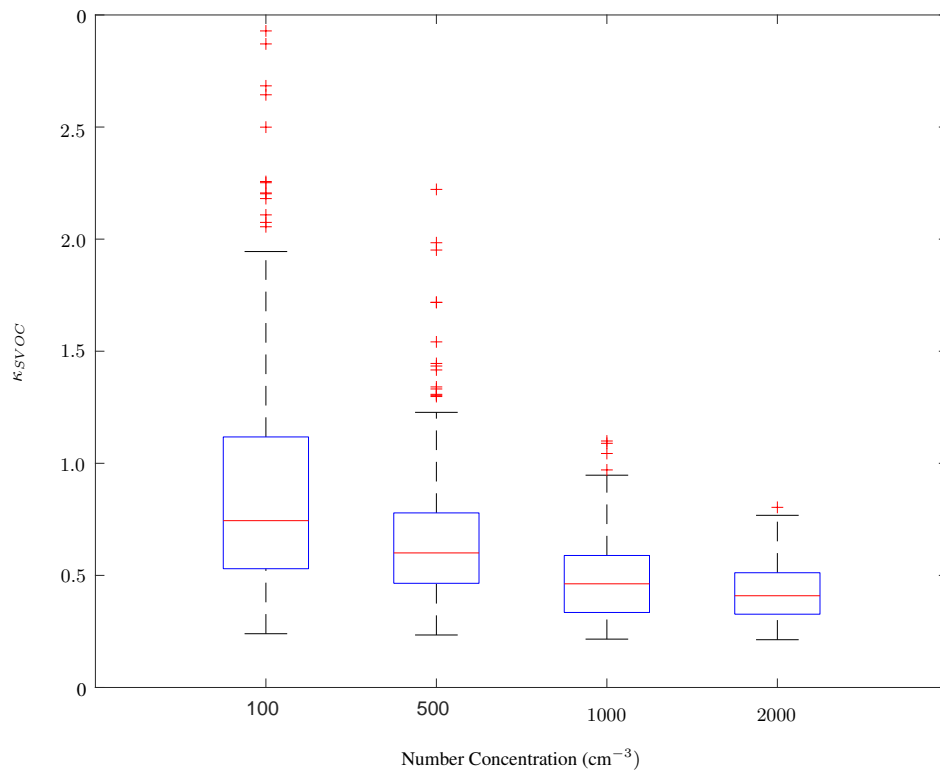

**Figure 1.**  $\kappa_{SVOC}$  values of ammonium sulphate at a range of mean number concentrations

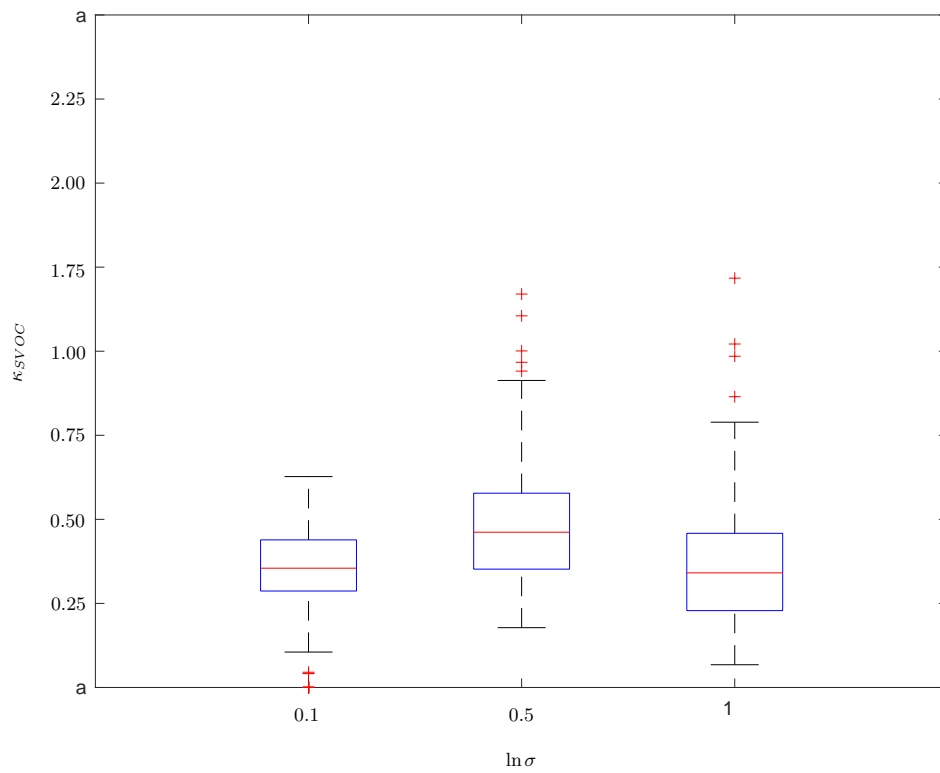

**Figure 2.**  $\kappa_{SVOC}$  values of ammonium sulphate at a range of geometric standard deviations

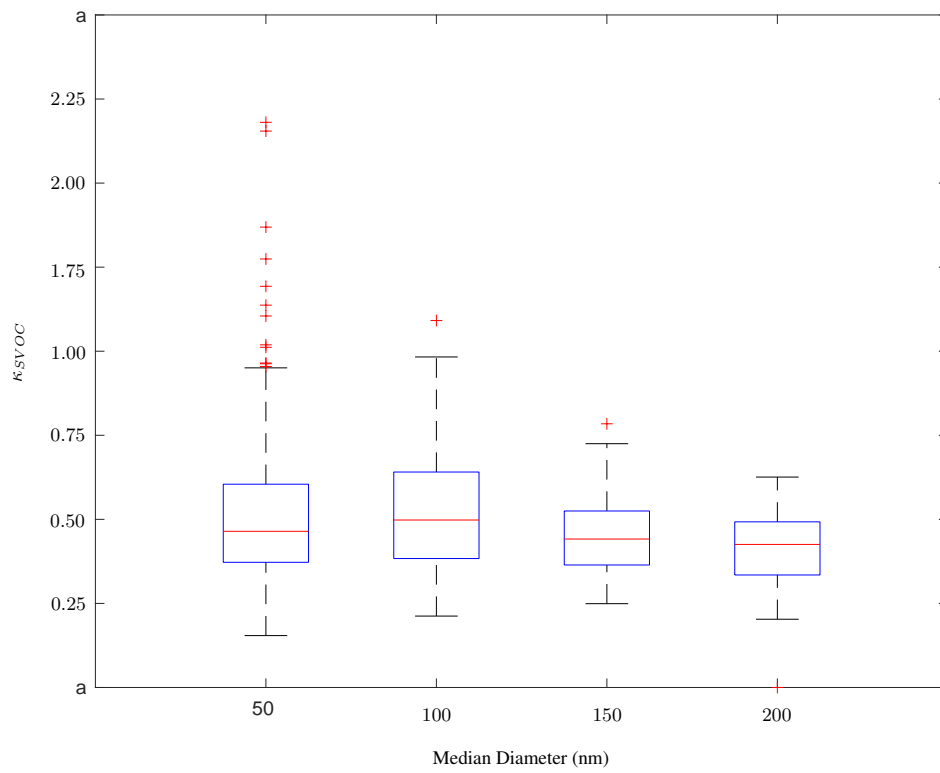

**Figure 3.**  $\kappa_{SVOC}$  values of ammonium sulphate at a range of mean median diameters
